# Supplementary material for: Avoiding coffee ring structure based on hydrophobic silicon pillar arrays during single-drop evaporation
Source: Royal Society of Chemistry journal article supplement (doi:10.1039/c2sm26271a), 2012-01-01
Supplement: c2sm26271a.pdf [file c2sm26271a.pdf]

Electronic Supplementary Information (ESI)

## **Avoiding coffee ring structure based on hydrophobic silicon pillar arrays during single-drop evaporation**

Liyang Cui<sup>1</sup>, Junhu Zhang<sup>1</sup>, Xuemin Zhang<sup>1</sup>, Yunfeng Li<sup>1</sup>, Zhanhua Wang<sup>1</sup>, Hainan Gao<sup>1</sup>,  
Tieqiang Wang<sup>1</sup>, Shoujun Zhu<sup>1</sup>, Hailing Yu<sup>2</sup> and Bai Yang<sup>1\*</sup>

1 State Key Laboratory of Supramolecular Structure and Materials, College of Chemistry,  
Jilin University, Changchun 130012, P. R. China.

2 College of Resources and Environment, Jilin Agricultural University, Changchun  
130118, P. R. China.

Corresponding E-mail: byangchem@jlu.edu.cn

### **SUPPLEMENTARY MOVIE LEGENDS**

**Movie S1** Water drop evaporation (4  $\mu\text{L}$ ) on HSPA at room temperature. The movie showed that the CA decreased, while base diameter remained constant during water drop evaporation, which was resulted from the pinning of the CL.

**Movie S2** Drop evaporation (4  $\mu\text{L}$ ) on HSPA at room temperature. The movie indicated that a drop of a colloidal suspension of latex spheres evaporated with the CA reducing and base diameter unchanging, which demonstrated the pinning of the CL.

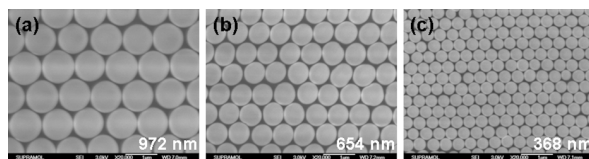

**Figure S1** Typical SEM images of 2D SiO<sub>2</sub> colloidal photonic crystals with (a) 972 nm, (b) 654 nm and (c) 368 nm in diameter. It could be seen that the packing structure of SiO<sub>2</sub> microspheres was face-centered cubic (fcc) with the (111) plane parallel to the substrate surface.

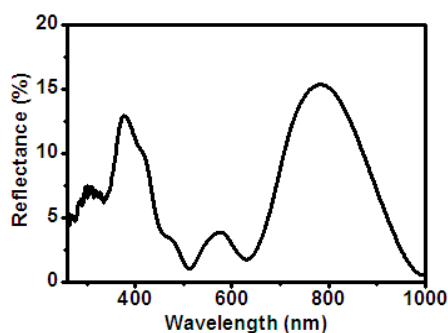

**Figure S2** The reflectance spectrum of as-prepared HSPA. It could be seen that the HSPA exhibited reflection peak at about 377 nm and 783 nm, which was in consistent with the color of the substrate.

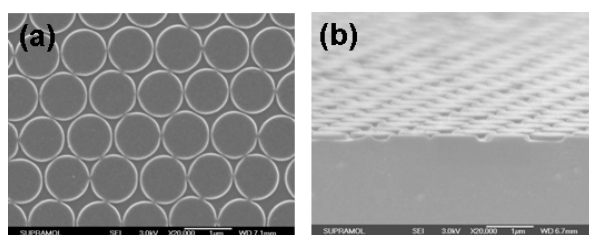

**Figure S3** (a) Typical top view and (b) cross-sectional SEM images of HSPA with 972 nm in period prepared by RIE for 2 min. It could be seen that the hexagonally non-close-packed silicon pillar was 119 nm in height and the distance between top rim of the adjacent silicon pillars was 94 nm.

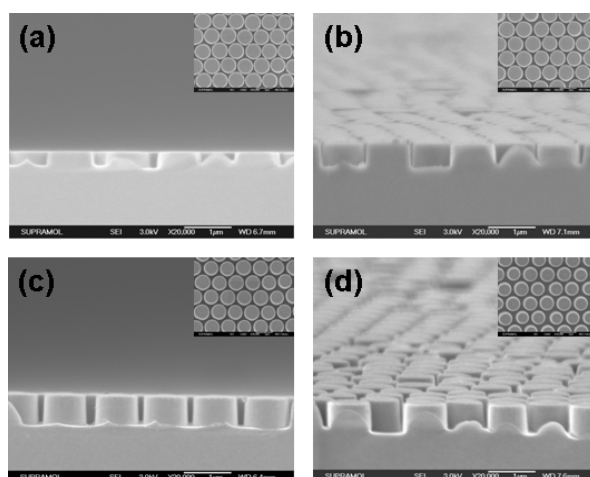

Figure S4 Typical cross-sectional SEM images of HSPA with 972 nm in period prepared by RIE for (a) 4 min, (b) 6 min, (c) 8 min and (d) 10 min. The insets were corresponding top view SEM images. It could be seen that the surface of hexagonally non-close-packed silicon pillar was smooth.

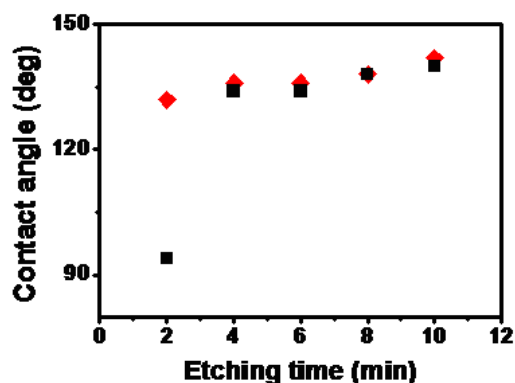

Figure S5 The CA values of HSPA with different etching time without modification trichloro(1H, 1H, 2H, 2H-perfluorooctyl)silane (black square) and with modification trichloro(1H, 1H, 2H, 2H-perfluorooctyl)silane (red rhomb). This indicated the change of CA value was little when the etching time varied from 4 to 10 min.

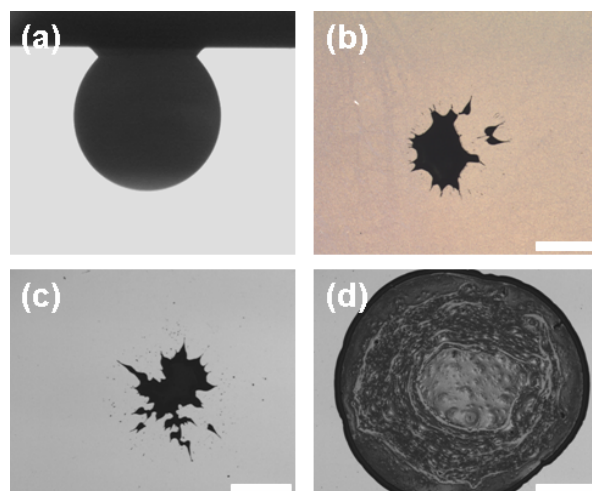

**Figure S6** (a) Optical image of a drop of a colloidal suspension of latex spheres pinned to the substrate when the tilting angle was  $\sim 180^\circ$ . The etching duration of the substrate was 6 min. The optical microscope images of deposition pattern of a drop of a colloidal suspension of latex spheres on (b) HSPA with modification trichloro(1H, 1H, 2H, 2H-perfluorooctyl)silane, (c) flat silicon with modification trichloro(1H, 1H, 2H, 2H-perfluorooctyl)silane and (d) flat silicon substrate. The scale bar is 1 mm. It showed the drop on HSPA was in high CA hysteresis.

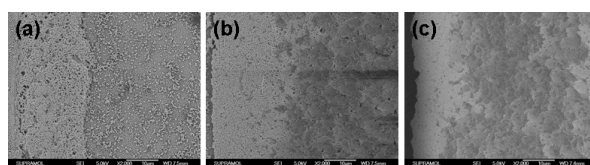

**Figure S7** Typical top view SEM images of the edge of drop deposition with the concentration of (a) 0.1 wt%, (b) 1 wt% and (c) 10 wt% poly(styrene-methyl methacrylate-acrylic acid) latex spheres. It demonstrated the number of latex spheres deposited at the edge of drop deposition was increasing with enhancing the concentration of latex spheres.

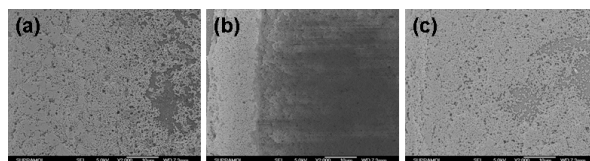

**Figure S8** The SEM images of the edge of drop deposition at (a) 40 °C, (b) 60 °C and (c) 80 °C. It displayed the latex spheres distribution was relatively uniform at the edge of drop deposition during drop evaporation at 60 °C.

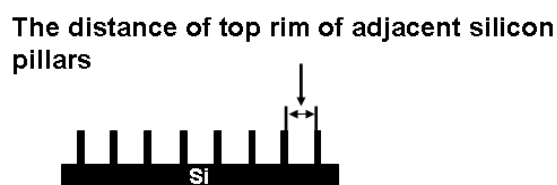

**Figure S9** It indicates the distance of top rim of adjacent silicon pillars.

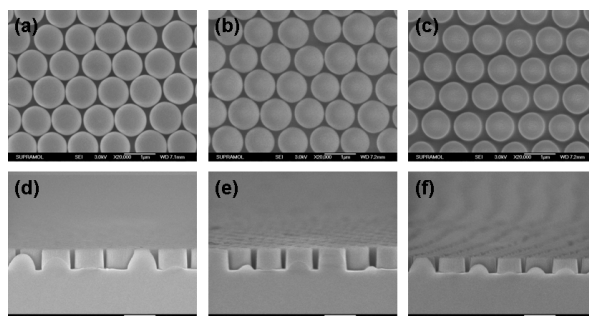

**Figure S10** Top view SEM images of non-close-packed SiO<sub>2</sub> colloidal photonic crystals fabricated by RIE for (a) 2 min, (b) 4 min, (c) 8 min and cross-sectional SEM images of HSPA prepared for (d) 6 min, (e) 5.5 min and (f) 3.3 min etching. Figure (a)-(c) indicated the SiO<sub>2</sub> spheres became small with increasing etching time, and Figure (d)-(f) displayed the HSPA were smooth.
